# Supplementary material for: Source characterization and removal of N-nitrosamine precursors during activated sludge treatment
Source: Royal Society of Chemistry journal article supplement (doi:10.1039/d0ew00425a), 2020-01-01
Supplement: d0ew00425a1.pdf [file d0ew00425a1.pdf]

1 Supporting Information

2

3

**Source Characterization and Removal of *N*-Nitrosamine Precursors**

4

**During Activated Sludge Treatment**

5

6

*Xiaolu Zhang, Daekyun Kim, David L. Freedman, and Tanju Karanfil\**

7

Department of Environmental Engineering and Earth Sciences, Clemson University, Anderson,  
8 SC 29625

9

10

\*Corresponding author phone: (864) 656-7701; e-mail: tkaranf@clemson.edu

11

12

13

14 **Table S1** Selected water quality parameters in wastewater components (after dilution)

| Samples <sup>a</sup> | Dilution factors  | DOC <sup>b</sup> (mg/L) | SUVA <sup>c</sup><br>(L·mg <sup>-1</sup> ·m <sup>-1</sup> ) | NH <sub>3</sub> -N <sup>d</sup> (mg/L) | TN <sup>e</sup> (mg/L) |
|----------------------|-------------------|-------------------------|-------------------------------------------------------------|----------------------------------------|------------------------|
| U1                   | 250               | 2.2                     | 1.2                                                         | 1.4                                    | 2.5                    |
| U2                   | 250               | 3.4                     | 1.2                                                         | 1.6                                    | 3.9                    |
| F1                   | 150               | 3.3                     | 1.1                                                         | 0.5                                    | 1.6                    |
| F2                   | 150               | 3.4                     | 1.5                                                         | 0.1                                    | 0.6                    |
| L1                   | N.A. <sup>f</sup> | 26                      | 1.0                                                         | 22                                     | 20                     |
| L2                   | N.A.              | 55                      | 1.3                                                         | 40                                     | 41                     |
| S1                   | N.A.              | 15                      | 0.3                                                         | 0.3                                    | 6.0                    |
| S2                   | N.A.              | 33                      | 1.1                                                         | 0.2                                    | 1.8                    |
| S3                   | N.A.              | 15                      | 0.3                                                         | 0.2                                    | 1.5                    |
| K1                   | N.A.              | 16                      | 0.5                                                         | N.D. <sup>g</sup>                      | 0.6                    |
| K2                   | 100               | 16                      | 0.5                                                         | N.D.                                   | 0.6                    |

15 <sup>a</sup>: U1-U2: raw urine samples collected before (U1) and after (U2) taking Zantac, both diluted 250 times in tap water; F1-F2: raw  
 16 feces samples collected before (F1) and after (F2) taking Zantac, both diluted 150 times in tap water; L1-L2: laundry greywaters  
 17 collected from washing machine discharges containing laundry detergent only (L1), or laundry detergent plus fabric softener (L2);  
 18 S1-S3: shower greywater not containing any personal care products (S1), containing shampoo (S2) or body wash only (S3); K1-  
 19 K2: kitchen greywater containing dishwashing detergent (K1), or mixed raw and cooked food waste leachates diluted 100 times in  
 20 tap water (K2). <sup>b</sup>: Dissolved organic carbon. <sup>c</sup>: Specific ultraviolet absorbance measured at 254 nm. <sup>d</sup>: Ammonia nitrogen. <sup>e</sup>: Total  
 21 nitrogen. <sup>f</sup>: Not applicable because there was no dilution. <sup>g</sup>: Not detectable (i.e., < 0.02 mg/L).  
 22

23 **Table S2** Key information of the selected wastewater treatment plants (WWTPs)

| WWTPs             | Activated sludge (AS) samples | Wastewater samples | Influent type                                | Treatment capacity (mgd) <sup>a</sup> | HRT <sup>b</sup> (h) | SRT <sup>c</sup> (d) | Treatment Process     | Nutrients Removal               | Industrial impact <sup>d</sup> |
|-------------------|-------------------------------|--------------------|----------------------------------------------|---------------------------------------|----------------------|----------------------|-----------------------|---------------------------------|--------------------------------|
| WWTP1             | Domestic AS                   | WW 1               | Domestic wastewater                          | 2.0                                   | 22-24                | 20                   | Extended aeration     | Nitrification                   | < 1%                           |
| WWTP2             | Municipal AS                  | WW 2               | Domestic wastewater and industrial discharge | 70                                    | 13.5                 | 12                   | Anaerobic/anoxic/oxic | Nitrogen and phosphorus removal | 25%                            |
| N.A. <sup>e</sup> | Textile AS                    | Not collected      | Textile wastewater                           | 1.7                                   | 5                    | 26                   | Extended aeration     | None (N is added)               | 100%                           |
| WWTP3             | Not collected                 | WW 3               | Predominantly domestic wastewater            | 3.0                                   | N.A.                 | N.A.                 | N.A.                  | N.A.                            | 8-15%                          |
| WWTP4             | Not collected                 | WW 4               | Predominantly domestic wastewater            | 4.0                                   | N.A.                 | N.A.                 | Membrane bioreactor   | Nitrification                   | 8-15%                          |

<sup>a</sup>: Million gallons per day. <sup>b</sup>: Hydraulic retention time. <sup>c</sup>: Solids retention time. <sup>d</sup>: The volume fraction of industrial discharge in WWTP influent. <sup>e</sup>: Not applicable or not available.

24  
25  
26

27 **Table S3** Selected water quality parameters in wastewater samples

| Wastewater samples | DOC (mg/L) | NH <sub>3</sub> -N (mg/L) | SUVA (L·mg <sup>-1</sup> ·m <sup>-1</sup> ) |
|--------------------|------------|---------------------------|---------------------------------------------|
| WW1                | 13         | 26                        | 2.0                                         |
| WW2                | 15         | 24                        | 2.0                                         |
| WW3                | 11         | 19                        | 2.1                                         |
| WW4                | 13         | 7                         | 1.8                                         |

28

29

30

31 **Table S4** Recipe of the mineral solution used to wash and resuspend AS solids

| Stock solutions <sup>a</sup> | Chemicals                                           | Concentrations (g/L) |
|------------------------------|-----------------------------------------------------|----------------------|
| A                            | KH <sub>2</sub> PO <sub>4</sub>                     | 8.50                 |
|                              | K <sub>2</sub> HPO <sub>4</sub>                     | 21.75                |
|                              | Na <sub>2</sub> HPO <sub>4</sub> ·2H <sub>2</sub> O | 33.40                |
|                              | NH <sub>4</sub> Cl                                  | 0.5                  |
| B                            | CaCl <sub>2</sub> ·2H <sub>2</sub> O                | 36.40                |
| C                            | MgSO <sub>4</sub> ·7H <sub>2</sub> O                | 22.50                |
| D                            | FeCl <sub>3</sub> ·6H <sub>2</sub> O                | 0.25                 |

32 <sup>a</sup>: To prepare 1 L of the mineral solution, 10 mL of solution A, 1 mL of solution B, C and D, respectively, were added to 987 mL  
 33 of dechlorinated tap water (OECD, 1992).

34  
 35  
 36

37 **Table S5** Key physiochemical properties of the seven selected *N*-nitrosamines

| <i>N</i> -nitrosamines                            | Chemical structures                                                                 | Molecular weight (g/mol) | log $K_{ow}$ <sup>a</sup> | 10 <sup>-6</sup> cancer risk level <sup>b</sup> (ng/L) |
|---------------------------------------------------|-------------------------------------------------------------------------------------|--------------------------|---------------------------|--------------------------------------------------------|
| <i>N</i> -Nitrosodimethylamine (NDMA)             | 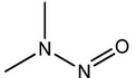   | 74.0                     | -0.57                     | 0.7                                                    |
| <i>N</i> -Nitrosodiethylamine (NDEA)              |    | 102.1                    | 0.48                      | 0.2                                                    |
| <i>N</i> -Nitrosopyrrolidine (NPYR)               |    | 100.1                    | -0.19                     | 15                                                     |
| <i>N</i> -Nitrosomorpholine (NMOR)                |    | 116.1                    | -0.44                     | 5                                                      |
| <i>N</i> -Nitrosodi- <i>n</i> -propylamine (NDPA) |    | 130.1                    | 1.36                      | 5                                                      |
| <i>N</i> -Nitrosopiperidine (NPIP)                |   | 114.1                    | 0.36                      | 3.5                                                    |
| <i>N</i> -Nitrosodi- <i>n</i> -butylamine (NDBA)  |  | 158.1                    | 2.63                      | 3                                                      |

38 <sup>a</sup>: US NLM (2019). <sup>b</sup>: US EPA (2001).

39

40

41 **Table S6** Volume fractions of blackwaters and greywaters in domestic sewage<sup>a</sup>

| Wastewater components | Volume fractions (%) |
|-----------------------|----------------------|
| Urine blackwater      | 22                   |
| Feces blackwater      | 8                    |
| Laundry greywater     | 26                   |
| Shower greywater      | 24                   |
| Kitchen greywater     | 9                    |

42 <sup>a</sup>: Zeng and Mitch (2015).

43

44

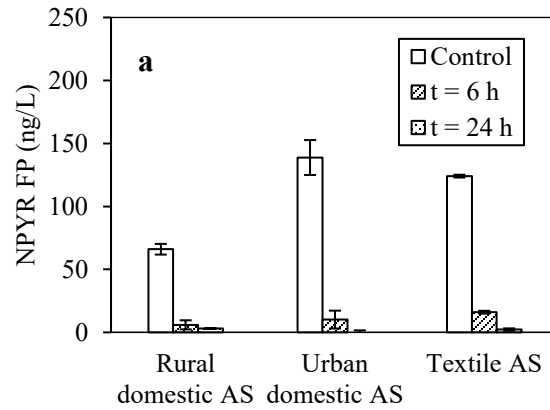

45

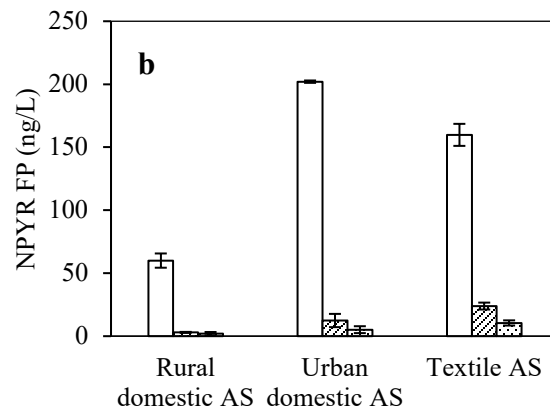

46

47 **Fig. S1** Reductions in NPYR FPs during 6 and 24-h AS treatment with urine blackwaters collected  
 48 (a) before and (b) after taking RNTD. Bar graph hereafter represents the average values from  
 49 duplicate measurements, and error bars hereafter represent the standard deviations of duplicate  
 50 measurements.

51

52

53



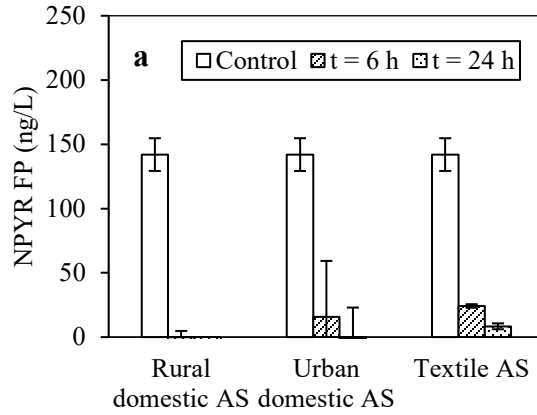

54

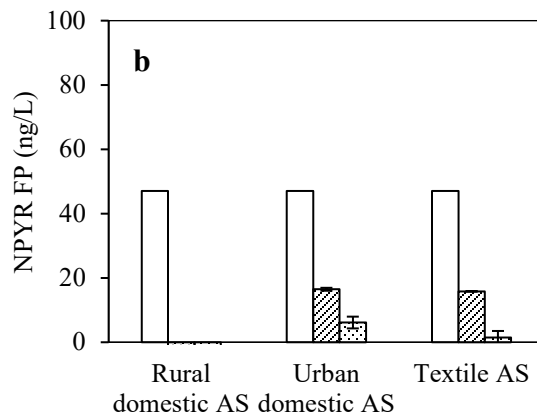

55

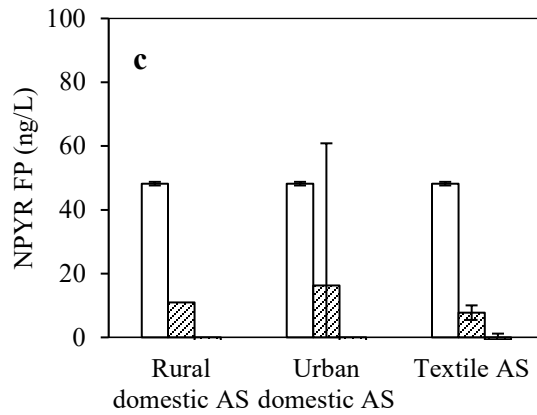

56

57 **Fig. S2** Reductions in NPYR FPs during AS treatment with shower greywaters containing (a) no  
 58 personal care products (S1), (b) shampoo only (S2), and (c) body wash only (S3).

59

60

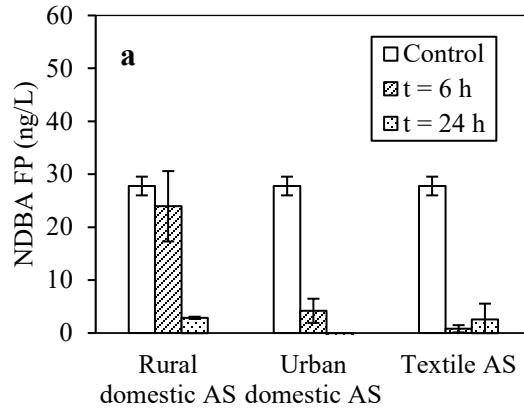

61

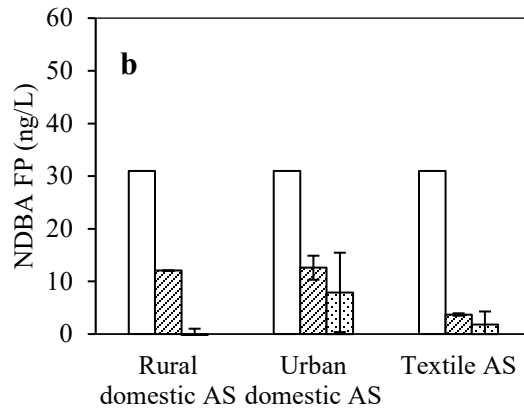

62

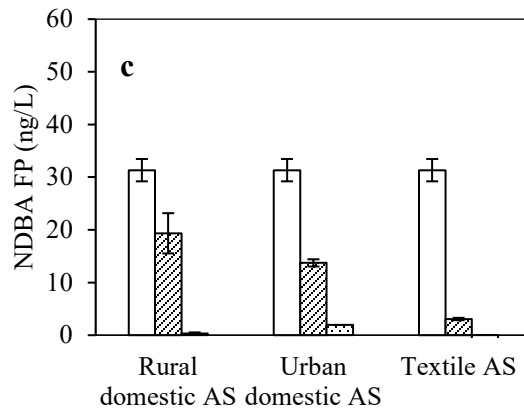

63

64 **Fig. S3** Reductions in NDBA FPs during AS treatment with shower greywaters containing (a) no  
 65 personal care products (S1), (b) shampoo only (S2), and (c) body wash only (S3).

66

67

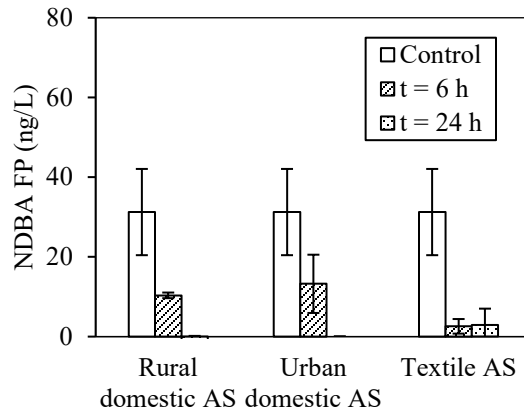

68

69 **Fig. S4** Reductions in NDBA FP during AS treatment with kitchen greywater containing  
 70 dishwashing detergent (K1).

71

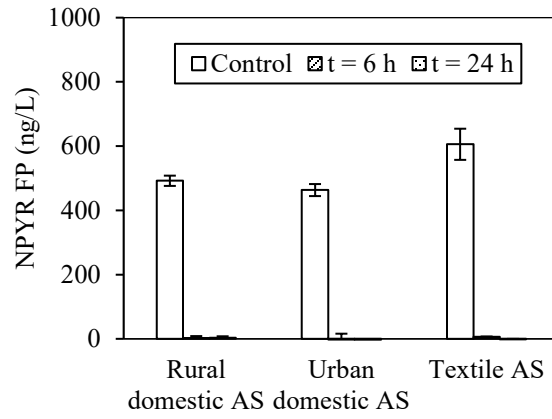

72

73 **Fig. S5** Reductions in NPYR FP during AS treatment with kitchen greywater containing food  
 74 leachates (K2).

75

76

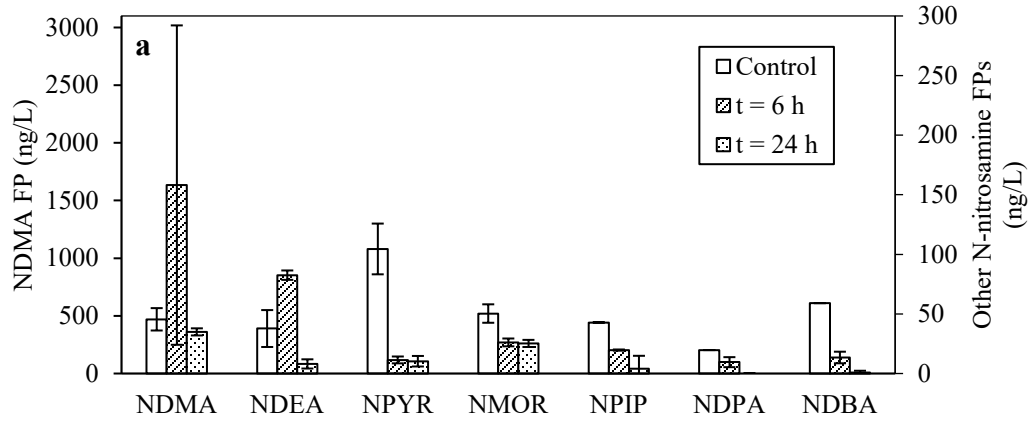

77

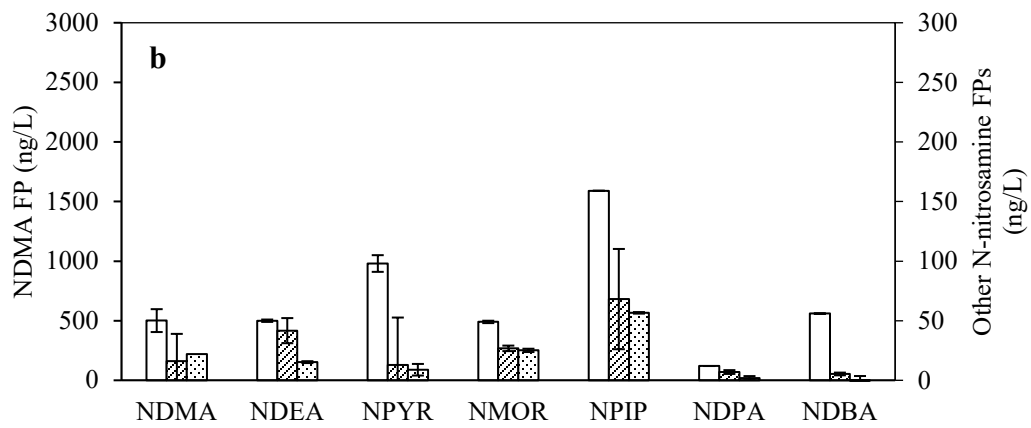

78 **Fig. S6** Reductions in *N*-nitrosamine FPs from laundry greywaters containing (a) laundry detergent  
79 only (L1), and (b) laundry detergent and fabric softener (L2) during treatment with the urban  
80 domestic AS.

81

82

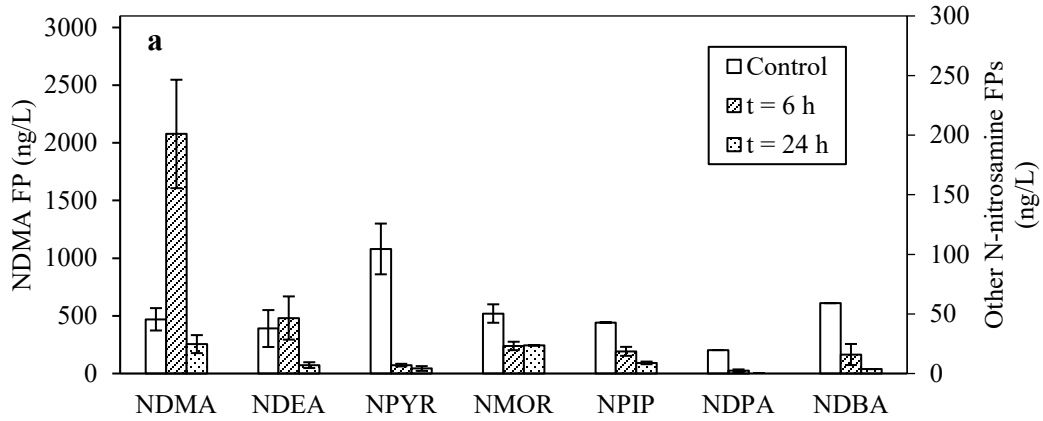

83

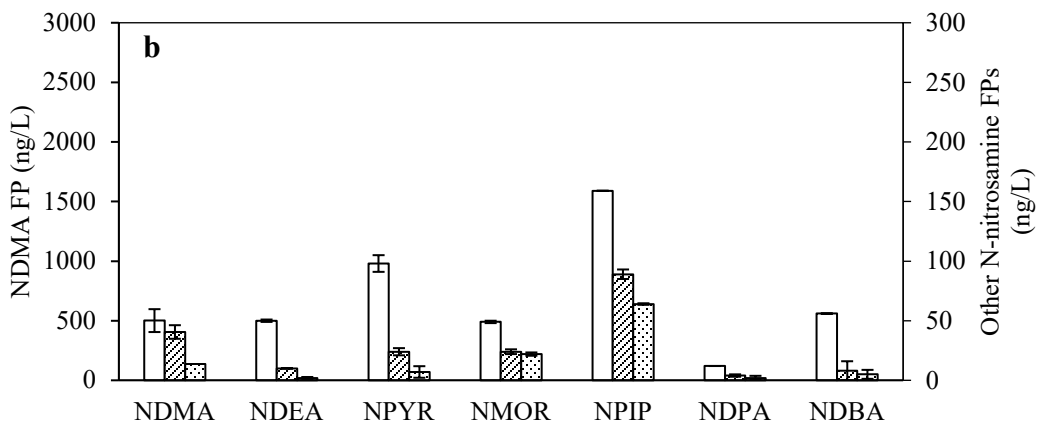

84 **Fig. S7** Reductions in *N*-nitrosamine FPs from laundry greywaters containing (a) laundry detergent

85 only (L1), and (b) laundry detergent and fabric softener (L2) during treatment with the textile AS.

86

87

88  
89  
90  
91  
92  
93  
94  
95  
96  
97  
98  
99  
100  
101  
102  
103  
104  
105  
106  
107  
108  
109  
110  
111  
112  
113  
114  
115

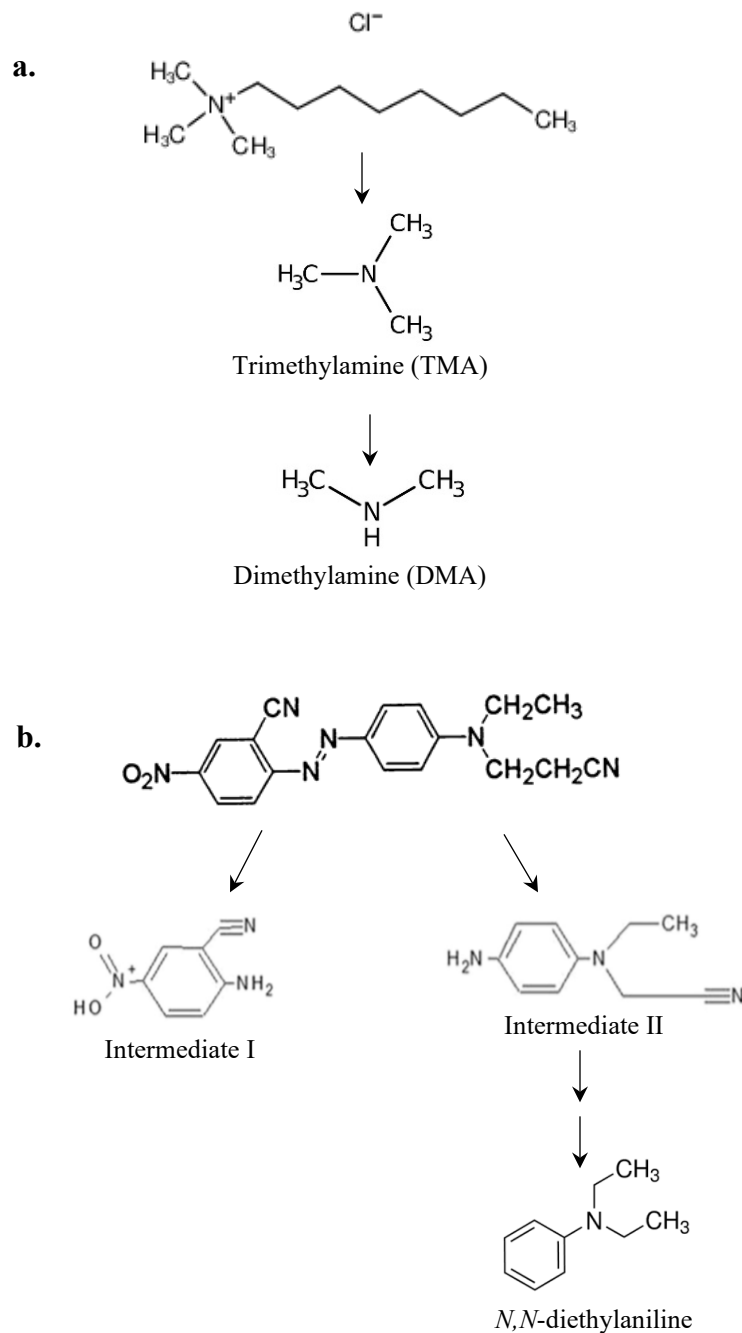

116 **Fig. S8** Biodegradation pathways of (a) an NDMA precursor (i.e., octyltrimethylammonium  
117 chloride, a quaternary ammonium salt) widely used in fabric softener, and (b) an NDEA precursor  
118 (i.e., an *N,N*-diethyl dye) during biodegradation with (a) a municipal AS inoculum or (b) a pure  
119 culture of selected bacterial strain (Verschuere, 2009; Watharkar et al., 2018).

**Table S7** *N*-nitrosamine FPs in raw wastewater samples without any AS treatment

| Wastewater samples | Season <sup>a</sup> | NDMA | NDEA | NPYR | NMOR | NDPA              | NPIP              | NDBA |
|--------------------|---------------------|------|------|------|------|-------------------|-------------------|------|
| WW1                | Spring              | 3650 | 4    | 138  | 21   | N.D. <sup>b</sup> | N.M. <sup>c</sup> | 27   |
|                    | Summer              | 1529 | 5    | 99   | 20   | N.D.              | 29                | 14   |
| WW2                | Spring              | 2440 | 10   | 424  | 24   | N.D.              | 113               | 24   |
|                    | Summer              | 3078 | 27   | 304  | 37   | N.D.              | N.M.              | 16   |
| WW4                | Summer              | 1849 | 10   | 131  | 12   | N.D.              | N.M.              | 30   |
| WW5                | Summer              | 2561 | 13   | 108  | 21   | N.D.              | N.M.              | 14   |

121  
122  
123  
124  
125  
126  
127

<sup>a</sup>: Seasons during which the wastewater samples were collected. <sup>b</sup>: Not detectable (i.e., < 3 ng/L). <sup>c</sup>: NPIP FP were not measurable in WW1 collected in spring, WW2 collected in summer, WW3 or WW4, because the target NPIP peak (115 m/z) was interfered with a neighbor peak (114 m/z) on GC spectrum.



**Table S8** Reductions in NDMA FPs during AS treatment with wastewater samples

| Wastewater samples | Season <sup>a</sup> | Domestic AS (summer) <sup>b</sup> |                  | Municipal AS (spring) <sup>c</sup> |                  | Municipal AS (summer) <sup>d</sup> |                  | Removal at WWTPs <sup>e</sup> (%) |
|--------------------|---------------------|-----------------------------------|------------------|------------------------------------|------------------|------------------------------------|------------------|-----------------------------------|
|                    |                     | 6-h removal (%)                   | 24-h removal (%) | 6-h removal (%)                    | 24-h removal (%) | 6-h removal (%)                    | 24-h removal (%) |                                   |
| WW1                | Spring              | 80                                | 93               | 63                                 | 69               | 73                                 | 85               | 92                                |
|                    | Summer              | 74                                | 78               |                                    |                  |                                    |                  | 71                                |
| WW2                | Spring              | 73                                | 86               | 74                                 | 79               | 69                                 | 87               | 77                                |
|                    | Summer              | 72                                | 83               |                                    |                  |                                    |                  | 62                                |
| WW3                | Summer              | 74                                | 79               |                                    |                  | 77                                 | 83               | 67                                |
| WW4                |                     | 78                                | 87               |                                    |                  | 76                                 | 82               | 51                                |

<sup>a</sup>: Seasons during which the wastewater samples were collected. <sup>b</sup>: AS 1 collected in summer. <sup>c</sup>: AS 2 collected in spring. <sup>d</sup>: AS 2 collected in summer. <sup>e</sup>: Determined via measuring NDMA FPs in WWTP primary and secondary effluents.

129  
130  
131  
132  
133

134 **Table S9** Reductions in the other *N*-nitrosamine (not including NDMA) FPs during AS treatment  
 135 with wastewater samples

| <i>N</i> -nitrosamines | Wastewater samples | Rural domestic AS (summer) <sup>a</sup> |                     | Urban domestic AS (summer) <sup>a</sup> |                     |
|------------------------|--------------------|-----------------------------------------|---------------------|-----------------------------------------|---------------------|
|                        |                    | 6-h incubation (%)                      | 24-h incubation (%) | 6-h incubation (%)                      | 24-h incubation (%) |
| NDEA                   | WW1 <sup>b</sup>   | N.M. <sup>c</sup>                       | N.M.                | 36                                      | 87                  |
|                        | WW2 <sup>c</sup>   | 27                                      | 94                  | 56                                      | 82                  |
|                        | WW3 <sup>d</sup>   | N.M.                                    | N.M.                | 100                                     | 71                  |
|                        | WW4 <sup>d</sup>   | 66                                      | 92                  | 80                                      | 100                 |
| NPYR                   | WW1                | 91                                      | 93                  | 66                                      | 90                  |
|                        | WW2                | 94                                      | 97                  | 90                                      | 99                  |
|                        | WW3                | 97                                      | 96                  | 98                                      | 93                  |
|                        | WW4                | 93                                      | 94                  | 89                                      | 96                  |
| NMOR                   | WW1                | 87                                      | 58                  | -38                                     | 9                   |
|                        | WW2                | -42 <sup>f</sup>                        | -55                 | 7                                       | 81                  |
|                        | WW3                | 28                                      | -28                 | 78                                      | 64                  |
|                        | WW4                | 64                                      | 75                  | -19                                     | 7                   |
| NPIP                   | WW1                | 92                                      | 94                  | N.M.                                    | N.M.                |
|                        | WW2                | N.M. <sup>g</sup>                       | N.M.                | 95                                      | 98                  |
|                        | WW3-WW4            | N.M.                                    | N.M.                | N.M.                                    | N.M.                |
| NDBA                   | WW1                | 100                                     | 100                 | 100                                     | 100                 |
|                        | WW2                | 100                                     | 100                 | 100                                     | 100                 |
|                        | WW3                | 100                                     | 100                 | 100                                     | 100                 |
|                        | WW4                | 72                                      | 100                 | 100                                     | 100                 |

136 <sup>a</sup>: AS collected in summer. <sup>b</sup>: WW1 collected in spring and summer were treated with the rural and urban domestic AS, respectively.  
 137 <sup>c</sup>: WW2 collected in spring and summer were treated with the rural and urban domestic AS, respectively. <sup>d</sup>: WW3 and WW4 were  
 138 collected in summer. <sup>e</sup>: NDEA FPs in WW1 and WW3 were extremely low (i.e., < 10 ng/L), thus not examined during the AS  
 139 treatment test. <sup>f</sup>: Increased after the AS treatment. <sup>g</sup>: NPIP FP from WW1 and WW2 collected in summer, WW3 and WW 4 were  
 140 not measurable because the target NPIP peak (115 m/z) was interfered with a neighbor peak (114 m/z) on GC spectrum.  
 141

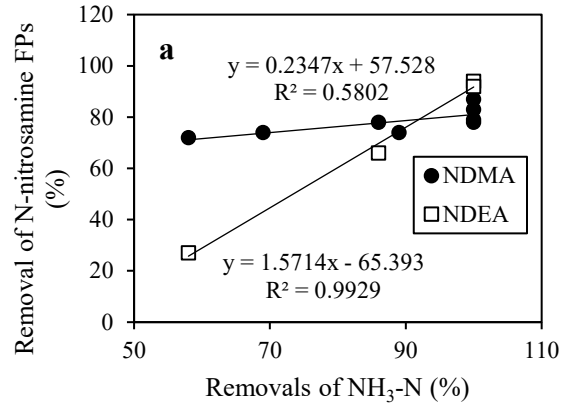

142

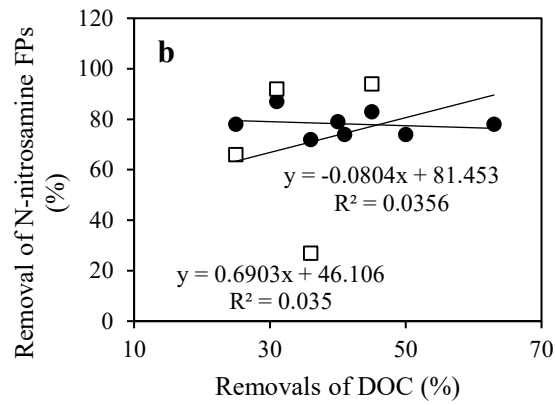

143

144 **Fig. S9** Correlation between the reductions of NDMA (or NDEA) FPs and the removal of (a)  $\text{NH}_3\text{-N}$ ,

145 N, and (b) DOC from wastewater samples (WW1-WW4) during treatment with the rural domestic

146 AS.

147

148

149

150 **References**

151 The U.S. National Library of Medicine (US NLM), *Hazardous Substances Data Bank (HSDB)*,  
152 2019.

153 The Organization for Economic Co-operation and Development (OECD), *OECD Guidelines for*  
154 *Testing Chemicals*, 1992.

155 US EPA, *Integrated Risk Information System*, 2001.

156 K. Verschueren, *Handbook of Environmental Data on Organic Chemicals*, John Wiley & Sons,  
157 Ltd., Hoboken, 2009.

158 A. D. Watharkar, S. K. Kadam, R. V. Khandare, P. D. Kolekar, B. Jeon, J. P. Jadhav and S. P.  
159 Govindwar, *Asparagus densiflorus* in a vertical subsurface flow phytoreactor for treatment of real  
160 textile effluent: A lab to land approach for *in situ* soil remediation, *Ecotoxicol. Environ. Saf.*, 2018,  
161 161, 70-77.

162 T. Zeng and W. A. Mitch, Contribution of *N*-nitrosamines and their precursors to domestic sewage  
163 by greywaters and blackwaters, *Environ. Sci. Technol.*, 2015, 49, 13158-13167.

164
